# Supplementary material for: Prebiotics and Probiotics for Gastrointestinal Disorders
Source: MDPI journal article supplement (doi:10.3390/nu16060778), 2024-03-09
Supplement: s1 [file s1]

### **Supplementary Material 1. Literature Search Query**

((prebiotic\*) OR (probiotic\*) OR (synbiotic\*) OR (Lactobacillus) OR (Bifidobacterium) OR (Saccharomyces) OR (ferment\*) OR (kefir) OR (yogurt) OR (inulin) OR (xylooligosaccharide) OR (fructooligosaccharide) OR (galactooligosaccharide) OR (oligosaccharide) OR (resistant starch) OR (pectin) OR (beta-glucan) OR (fiber) OR (lactulose) OR (plantago ova) OR (germinated barley)) AND ((gastro\*) OR (intestin\*) OR (irritable bowel) OR (inflammatory bowel) OR (Crohn\*) OR (ileitis) OR (enteritis) OR (colitis) OR (celiac) OR (pylori)) AND (("clinical study"[Publication Type]) OR ("observational study"[Publication Type]) OR ("clinical trial"[Publication Type]) OR ("controlled clinical trial"[Publication Type]) OR ("equivalence trial"[Publication Type]) OR ("guideline"[Publication Type]) OR ("meta-analysis"[Publication Type]) OR ("practice guideline"[Publication Type]) OR ("pragmatic clinical trial"[Publication Type]) OR ("randomized controlled trial"[Publication Type]) OR ("systematic review"[Publication Type]))
