# Supplementary material for: Prebiotics and Probiotics for Gastrointestinal Disorders
Source: MDPI journal article supplement (doi:10.3390/nu16060778), 2024-03-09
Supplement: s1 [file s1]

Table S1. Summary of prebiotics, probiotics, and synbiotics shown to be effective for gastrointestinal (GI) conditions\*

|            |                                                                                                                                                                    | Infectious diarrhea | Antibiotic-associated diarrhea | Clostridioides difficile infection | Radiation-induced diarrhea | Constipation | Irritable Bowel Syndrome | Small Intestinal Bacterial Overgrowth | Ulcerative Colitis | Pouchitis | Celiac Disease | Helicobacter pylori infection |
|------------|--------------------------------------------------------------------------------------------------------------------------------------------------------------------|---------------------|--------------------------------|------------------------------------|----------------------------|--------------|--------------------------|---------------------------------------|--------------------|-----------|----------------|-------------------------------|
| Prebiotics | Inulin                                                                                                                                                             |                     |                                |                                    | X                          | X            |                          |                                       |                    |           |                |                               |
|            | FOS (includes 1-kestose)                                                                                                                                           |                     |                                |                                    |                            |              | X                        | X                                     |                    |           |                |                               |
|            | GOS (includes Deshpu stachyose granules)                                                                                                                           |                     |                                |                                    | X                          | X            |                          |                                       |                    |           |                |                               |
|            | Germinated barley foodstuff                                                                                                                                        |                     |                                |                                    |                            |              |                          | X                                     |                    |           |                |                               |
|            | Plantago ovata seeds                                                                                                                                               |                     |                                |                                    |                            |              |                          | X                                     |                    |           |                |                               |
| Probiotics | <i>Saccharomyces</i> spp.                                                                                                                                          |                     |                                |                                    |                            |              |                          |                                       |                    |           |                |                               |
|            | <i>S. boulardii</i> (includes strain CNCM I-745)                                                                                                                   | X                   | X                              | X                                  |                            |              | X                        |                                       |                    |           |                | X                             |
|            | <i>Lactobacillus</i> spp.                                                                                                                                          |                     |                                |                                    |                            |              |                          |                                       |                    |           |                |                               |
|            | <i>L. acidophilus</i>                                                                                                                                              |                     |                                |                                    | X                          |              |                          |                                       |                    |           |                | X                             |
|            | <i>L. reuteri</i>                                                                                                                                                  | X                   |                                |                                    |                            |              |                          |                                       |                    |           |                |                               |
|            | <i>L. casei</i> (includes strain DN 114001)                                                                                                                        |                     | X                              |                                    |                            |              | X                        |                                       |                    |           |                |                               |
|            | <i>L. rhamnosus</i> GG                                                                                                                                             | X                   | X                              |                                    | X                          |              |                          |                                       |                    |           |                |                               |
|            | <i>L. plantarium</i>                                                                                                                                               |                     |                                |                                    |                            | X            |                          |                                       |                    |           |                |                               |
|            | <i>Bifidobacterium</i> spp.                                                                                                                                        |                     |                                |                                    |                            |              |                          |                                       |                    |           |                |                               |
|            | <i>B. lactis</i>                                                                                                                                                   | X                   |                                |                                    | X                          |              |                          |                                       |                    |           |                |                               |
|            | <i>B. infantis</i>                                                                                                                                                 |                     |                                |                                    |                            |              |                          |                                       |                    | X         |                |                               |
|            | <i>Streptococcus</i> spp.                                                                                                                                          |                     |                                |                                    |                            |              |                          |                                       |                    |           |                |                               |
|            | <i>S. faecium</i>                                                                                                                                                  |                     |                                |                                    |                            | X            |                          |                                       |                    |           |                |                               |
|            | <i>Escherichia</i> spp.                                                                                                                                            |                     |                                |                                    |                            |              |                          |                                       |                    |           |                |                               |
|            | <i>E. coli</i> DSM 17252                                                                                                                                           |                     |                                |                                    |                            | X            |                          |                                       |                    |           |                |                               |
|            | Multi-strain formulations                                                                                                                                          |                     |                                |                                    |                            |              |                          |                                       |                    |           |                |                               |
|            | VSL#3®                                                                                                                                                             |                     |                                |                                    | X                          |              |                          | X                                     | X                  |           |                |                               |
|            | <i>L. acidophilus</i> + <i>B. bifidum</i>                                                                                                                          |                     |                                |                                    | X                          |              |                          |                                       |                    |           |                |                               |
|            | <i>L. acidophilus</i> LAC-361 + <i>B. longum</i> BB-536                                                                                                            |                     |                                |                                    | X                          |              |                          |                                       |                    |           |                |                               |
|            | <i>L. acidophilus</i> CL1285 + <i>L. casei</i> LBC80R                                                                                                              |                     |                                | X                                  |                            |              |                          |                                       |                    |           |                |                               |
|            | <i>L. plantarum</i> LRCC5193 + <i>S. thermophilus</i> MG510                                                                                                        |                     |                                |                                    |                            | X            |                          |                                       |                    |           |                |                               |
|            | <i>E. faecalis</i> + <i>B. longum</i>                                                                                                                              |                     |                                |                                    |                            |              | X                        |                                       |                    |           |                |                               |
|            | <i>Lactobacillus</i> spp + <i>Bifidobacterium</i> spp + <i>Saccharomyces</i> spp                                                                                   | X                   |                                |                                    |                            |              |                          |                                       |                    |           |                |                               |
|            | <i>Bacillus</i> spp + <i>Enterococcus</i> spp + <i>Clostridium</i> spp                                                                                             | X                   |                                |                                    |                            |              |                          |                                       |                    |           |                |                               |
|            | <i>L. acidophilus</i> + <i>B. longum</i> + <i>Enterococcus faecalis</i>                                                                                            |                     |                                |                                    |                            |              | X                        |                                       |                    |           |                |                               |
|            | <i>L. acidophilus</i> + <i>L. bulgaricus</i> + <i>B. bifidum</i>                                                                                                   |                     |                                | X                                  |                            |              |                          |                                       |                    |           |                |                               |
|            | <i>L. acidophilus</i> + <i>B. bifidum</i> + <i>L. rhamnosus</i>                                                                                                    |                     |                                |                                    |                            | X            |                          |                                       |                    |           |                |                               |
|            | <i>L. acidophilus</i> LA-5 + <i>L. plantarum</i> + <i>B. lactis</i> BB-12 + <i>S. boulardii</i>                                                                    |                     |                                |                                    |                            |              |                          |                                       |                    |           |                | X                             |
|            | <i>L. acidophilus</i> Rosell-52 + <i>L. acidophilus</i> Rosell-11 + <i>B. infantis</i> Rosell-1755 + <i>S. boulardii</i>                                           |                     |                                |                                    |                            |              |                          |                                       |                    |           |                | X                             |
|            | <i>L. acidophilus</i> + <i>L. bulgaricus</i> + <i>B. bifidum</i> + <i>S. thermophilus</i>                                                                          |                     |                                | X                                  |                            |              |                          |                                       |                    |           |                |                               |
|            | <i>L. acidophilus</i> LA3 + <i>L. casei</i> BGP93 + <i>B. lactis</i> BLC1                                                                                          |                     |                                |                                    |                            | X            |                          |                                       |                    |           |                |                               |
|            | <i>L. casei</i> , <i>L. plantarum</i> , <i>B. lactis</i> , <i>B. breve</i> Bbr8, and <i>B. breve</i> B110                                                          |                     |                                |                                    |                            |              |                          |                                       |                    | X         |                |                               |
|            | <i>L. acidophilus</i> + <i>L. rhamnosus</i> + <i>B. longum</i> + <i>B. bifidum</i> + <i>B. lactis</i> + <i>S. thermophilus</i>                                     |                     |                                |                                    |                            | X            |                          |                                       |                    |           |                |                               |
|            | <i>L. acidophilus</i> + <i>L. rhamnosus</i> + <i>L. paracasei</i> + <i>L. casei</i> + <i>B. bifidum</i> + <i>B. longum</i> + <i>B. lactis</i> + <i>B. animalis</i> |                     |                                |                                    | X                          |              |                          |                                       |                    |           |                |                               |
| Synbiotics | Lactulose + <i>L. acidophilus</i>                                                                                                                                  |                     |                                | X                                  |                            |              |                          |                                       |                    |           |                |                               |
|            | FOS + <i>Bacillus coagulans</i>                                                                                                                                    |                     |                                |                                    |                            |              | X                        |                                       |                    |           |                |                               |
|            | scFOS + <i>B. longum</i> W11                                                                                                                                       |                     |                                |                                    |                            | X            |                          |                                       |                    |           |                |                               |
|            | Psyllium + <i>B. longum</i>                                                                                                                                        |                     |                                |                                    |                            |              |                          | X                                     |                    |           |                |                               |
|            | Acacia dietary fibre + <i>B. lactis</i> BB-12 + <i>S. thermophilus</i> + <i>L. acidophilus</i>                                                                     |                     |                                |                                    |                            | X            |                          |                                       |                    |           |                |                               |
|            | Pectin + GOS + <i>L. acidophilus</i> LA-5 + <i>B. lactis</i> BB-12 + <i>L. bulgaricus</i> + <i>S. thermophilus</i>                                                 |                     |                                |                                    |                            |              |                          |                                       |                    |           |                | X                             |
|            | FOS + GOS + <i>L. casei</i> + <i>L. rhamnosus</i> + <i>L. plantarum</i> + <i>B. lactis</i>                                                                         |                     |                                |                                    | X                          |              |                          |                                       |                    |           |                |                               |

\*Not an exhaustive list of prebiotics or probiotics studied for GI conditions

Abbreviations: FOS, fructooligosaccharide; scFOS, short-chain fructooligosaccharide; GOS, galactooligosaccharide
